# Supplementary material
Source: PubMed Central journal article supplement (PMC5838970)
Supplement: 41431_2017_18_MOESM7_ESM.pdf [file 41431_2017_18_MOESM7_ESM.pdf]

PATIENT 3: HOMOZYGOUS DUPLICATION OF *TRAPPC9* GENE

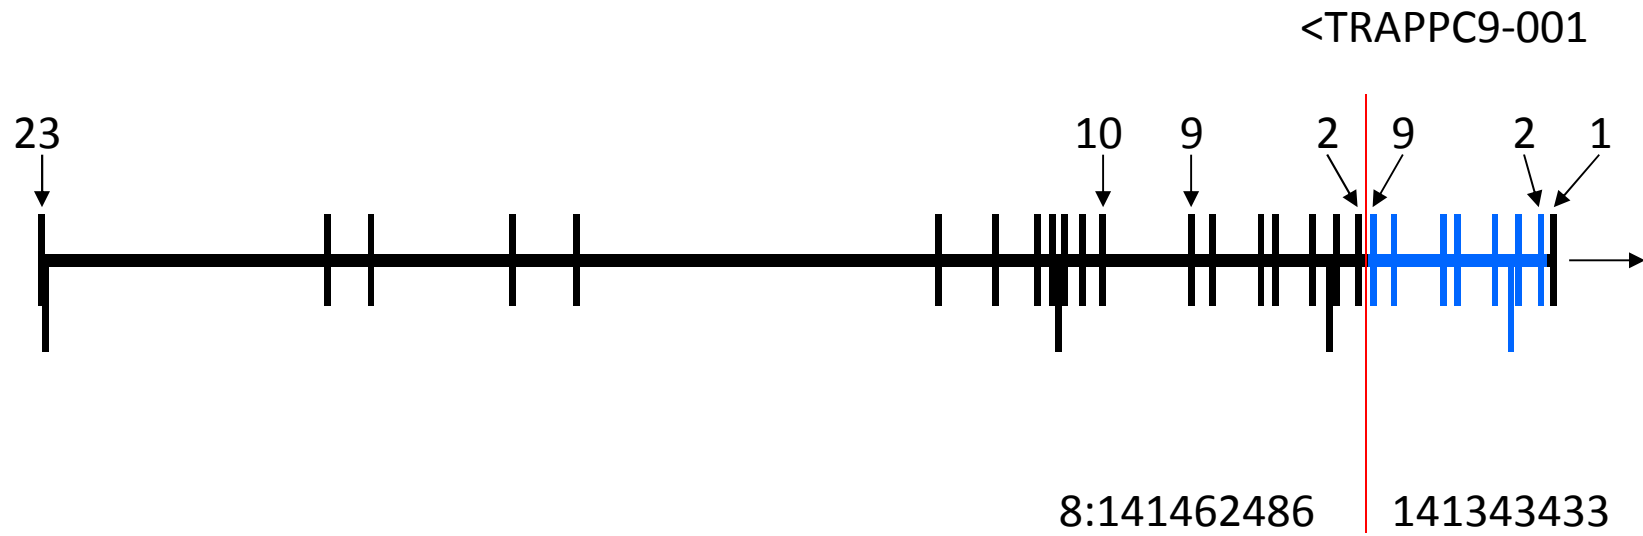

*All nucleotide positions in hg 19*

PATIENT 3: REPEATED SEQUENCES AT THE DUPLICATION JUNCTION

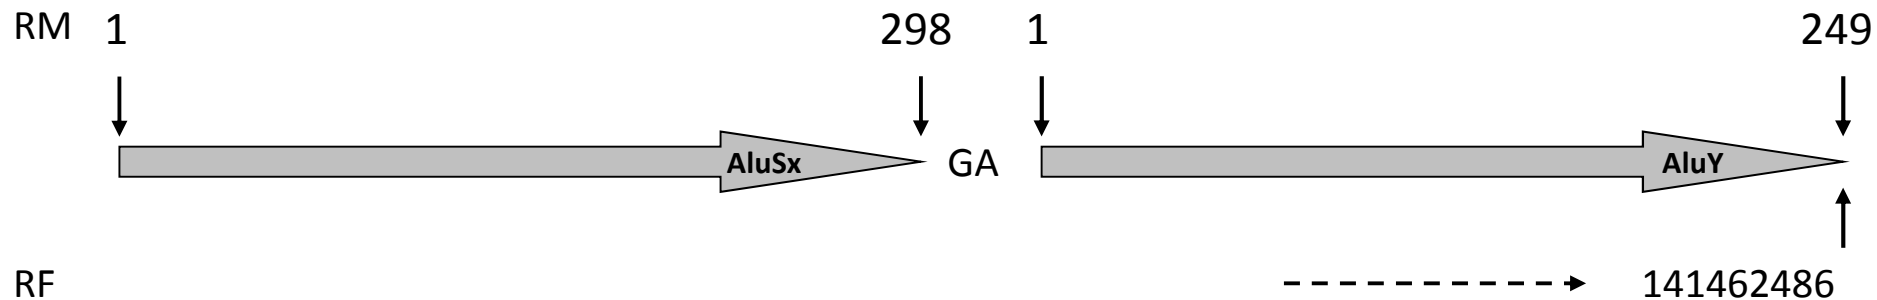

AGATATAGATATCTATATCTATATATAGATAGCTAGATATATCTATATCTATATA

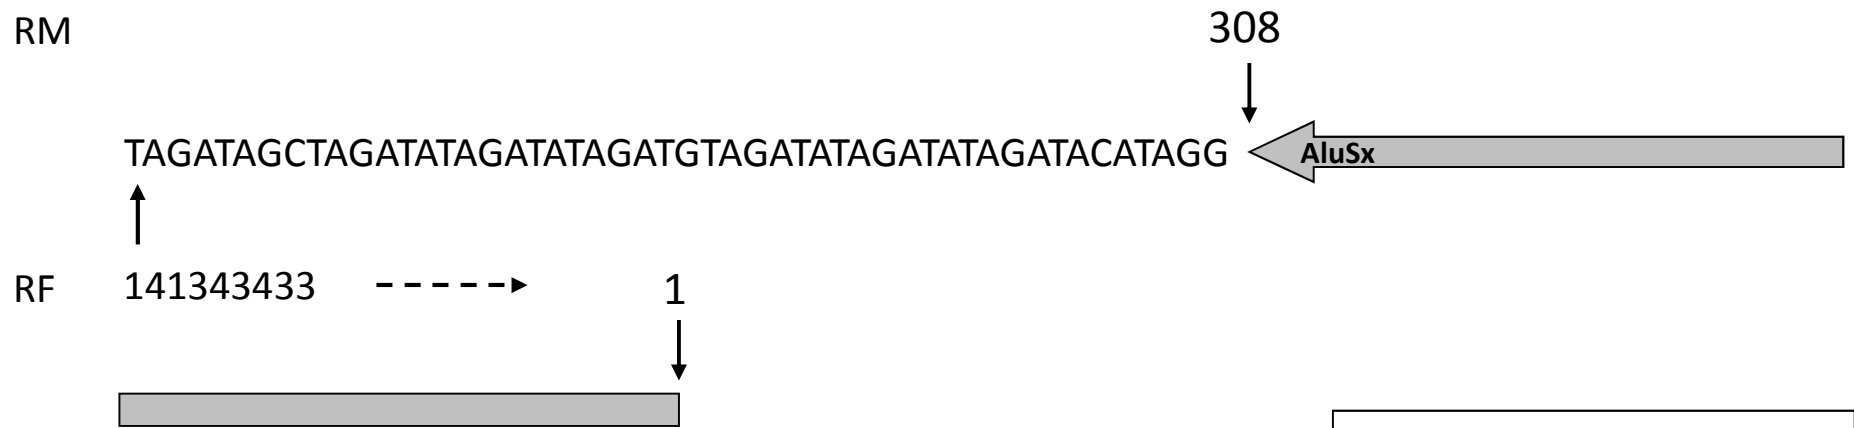

RM: RepeatMasker  
RF: Reference Sequence

PATIENT 3: GENOMIC SEQUENCE AT THE DUPLICATION JUNCTION

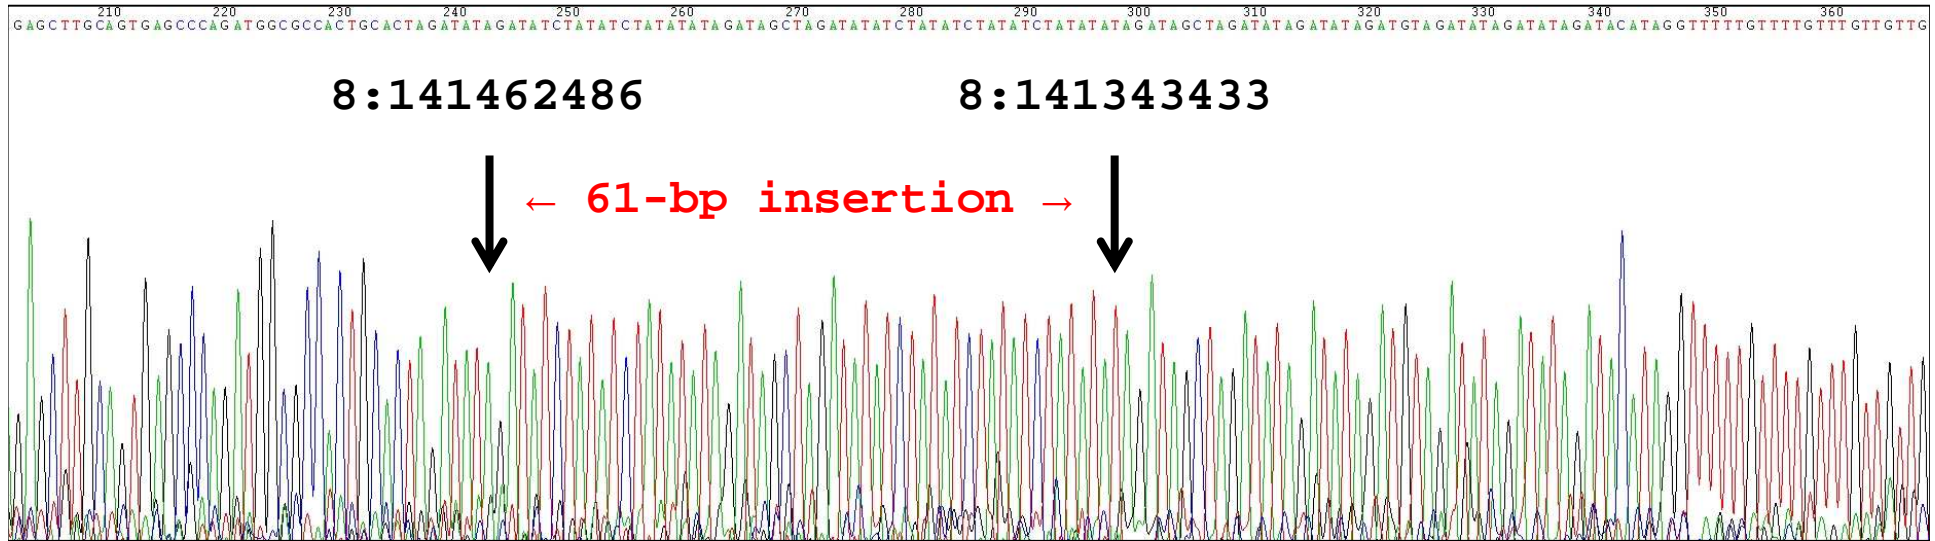

AAATTAGCCCGGCGTGGTGGCAGGCACCTGTAGTCCAGCTACTTGGGAGGCTGAGGCAG

8:141462486 ↓

GAGAATGGCATGAACCAGGGAGGCAGAGCTTGCAGTGAGCCCAGATGGCGCCACTGCACT

**AGATATAGATATCTATATCTATATATAGCTAGATATATCTATATCTATATCTATATA**

**← 61-bp insertion →**

TAGATAGCTAGATATAGATATAGATGTAGATATAGATATAGATACATAGGTTTTTGT

↑ 8:141343433

GTTTGTGTTGTTGTTGTTGAGACGGAGTCTCACTCTTGTGCGCCAGGCTGGAGTGCAATGGT

PATIENT 3: *TRAPPC9* DUPLICATION cDNA SEQUENCE

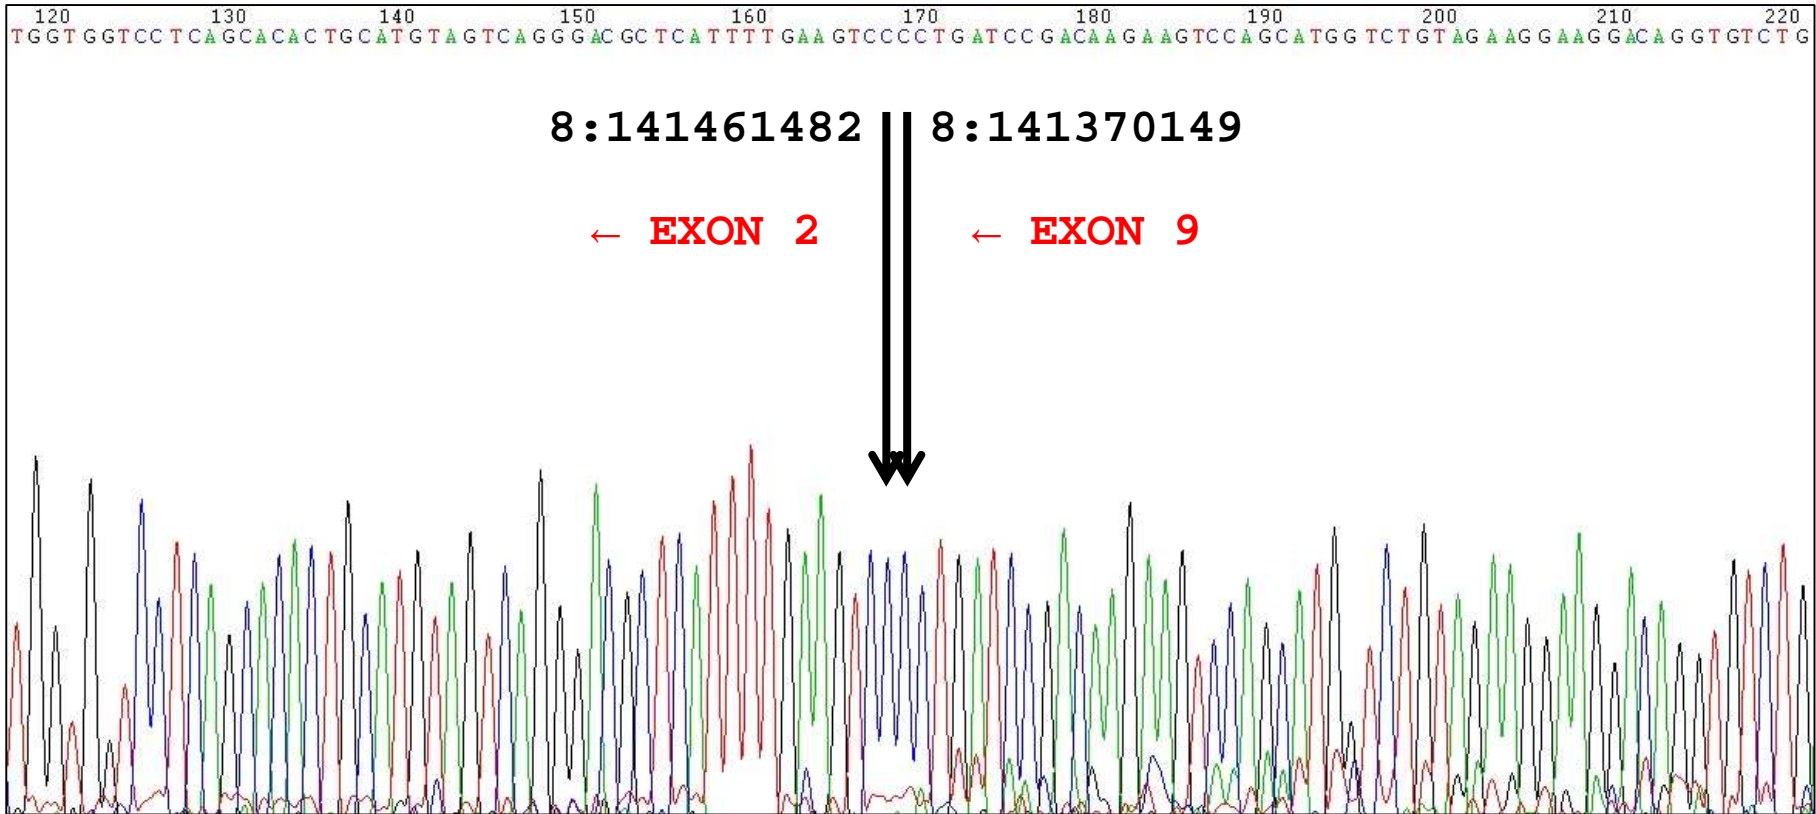

← Exon 2 AGTGGTGCCTGTAGCGGATGTAGAGGACTCGCTGGGAGTCCCGCACGCTGA  
TCTGACTCACAGAGCAAATCCTCTTATAGATCCTGAAGAAGTTCTCCTCGGAGACGATGC  
CCACAGGCTGGACCACCACGAGCAGCGTCTGGTGGTCCTCAGCACACTGCATGTAGTCAG  
GGACGCTCATTTTGAAGTCC\_CCTGATCCGACAAGAAGTCCAGCATGGTCTGTAGAAGGA  
AGGACAGGTGTCTGACAGAGAGGGCAGGGTTCCCCATCCTTCGGGAGGCGTAGACCAATT  
CATGGAGCAAACGCATCTGG ← Exon 9 (310 bp)

| <b>cDNA PRIMERS</b> | <b>SEQUENCES</b>     | <b>LOCATION (hg19)</b> | <b>Exon</b> |
|---------------------|----------------------|------------------------|-------------|
| TRAPPC9_ex2_F1      | AGTGGTGCCTGTAGCGGATG | 8:141461292-141461310  | 2           |
| TRAPPC9_ex9_R1      | CCAGATGCGTTTGCTCCATG | 8:141370248-141370267  | 9           |
